# Supplementary material for: At-home testing to mitigate community transmission of SARS-CoV-2: protocol for a public health intervention with a nested prospective cohort study
Source: Springer Nature journal article supplement (doi:10.1186/s12889-021-12007-w), 2021-12-01

# Overview of Key Assumptions for Modeling of Estimated Impact of SARS-CoV-2 Self-testing (1/2)

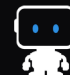

| Assumption                                                      | Value                                                                        |
|-----------------------------------------------------------------|------------------------------------------------------------------------------|
| Study Period                                                    | February 1 to March 7 (5 weeks)                                              |
| Test taking period                                              | 4 or 5 weeks depending on scenario (see previous page)                       |
| Test kit size                                                   | 1 kit of of 25 tests per household                                           |
| Test Cost                                                       | \$10 per test                                                                |
| Testing Frequency                                               | Varies by scenario (see previous page)                                       |
| Maximum participants per location                               | 50% of the population                                                        |
| Reduction in interaction from positive at-home test (RCF)*      | Sampled between 50% and 90%                                                  |
| Test device sensitivity                                         | 95% sensitive (constant sensitivity starting at 10 <sup>6</sup> copies / mL) |
| % of tests taken correctly*                                     | Sampled between 63% and 95%                                                  |
| Combined overall test sensitivity*                              | Varies between 60% and 90%                                                   |
| Contagiousness over time                                        | (see next page)                                                              |
| Asymptomatic Rate                                               | 30% weighted average across age groups                                       |
| % of participants that take the test regularly throughout study | 40% (discussed range 30 to 50%)                                              |

Combined test sensitivity =  
(device sensitivity) x (% of tests taken correctly)

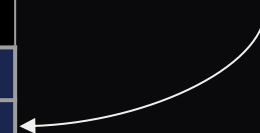

## Legend

- New from previous analysis
- Varied assumption ranges

\* For uncertainty analysis, we assume that the actual studies will fall within the parameter ranges shown with 95% probability.

# Overview of Key Assumptions for Modeling of Estimated Impact of SARS-CoV-2 Self-testing (2/2)

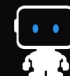

## Viral load over time by infection severity path

We assume viral load of an infected person varies by the severity of the infection (rows) and by day of infection (columns). We use the following viral load by infection severity path assumptions in our model.

| Viral load per severity over time, copies/ml |         |         |         |         |         |         |         |         |         |         |         |         |         |         |         |
|----------------------------------------------|---------|---------|---------|---------|---------|---------|---------|---------|---------|---------|---------|---------|---------|---------|---------|
|                                              | Day 1   | Day 2   | Day 3   | Day 4   | Day 5   | Day 6   | Day 7   | Day 8   | Day 9   | Day 10  | Day 11  | Day 12  | Day 13  | Day 14  | Day 15  |
| Path 0R                                      | 0.0E+00 | 1.0E+05 | 9.5E+05 | 2.9E+06 | 2.8E+07 | 2.8E+07 | 2.8E+07 | 2.9E+06 | 3.1E+05 | 1.0E+05 | 5.1E+04 | 5.1E+04 | 5.1E+04 | 5.1E+04 | 0.0E+00 |
| Path 1R                                      | 0.0E+00 | 1.0E+05 | 9.5E+05 | 2.9E+06 | 4.3E+07 | 2.6E+08 | 8.5E+07 | 2.9E+06 | 3.1E+05 | 1.0E+05 | 5.1E+04 | 5.1E+04 | 5.1E+04 | 5.1E+04 | 0.0E+00 |
| Path 2R                                      | 0.0E+00 | 1.0E+05 | 9.5E+05 | 2.9E+06 | 6.8E+07 | 4.1E+08 | 2.6E+08 | 2.9E+06 | 9.5E+05 | 1.0E+05 | 5.1E+04 | 5.1E+04 | 5.1E+04 | 5.1E+04 | 0.0E+00 |
| Path 3R                                      | 0.0E+00 | 1.0E+05 | 9.5E+05 | 2.9E+06 | 1.1E+08 | 6.5E+08 | 4.1E+08 | 2.9E+06 | 9.5E+05 | 1.0E+05 | 5.1E+04 | 5.1E+04 | 5.1E+04 | 5.1E+04 | 0.0E+00 |
| Path 3D                                      | 0.0E+00 | 1.0E+05 | 9.5E+05 | 2.9E+06 | 1.7E+08 | 2.5E+09 | 6.5E+08 | 2.9E+06 | 9.5E+05 | 1.0E+05 | 5.1E+04 | 5.1E+04 | 5.1E+04 | 5.1E+04 | 0.0E+00 |

Sources: Kucirka et al., 2020; Pujada et al., 2020; Scola et al., 2020

## Infection severity progression paths

Each infection follows a specific severity path with different viral load

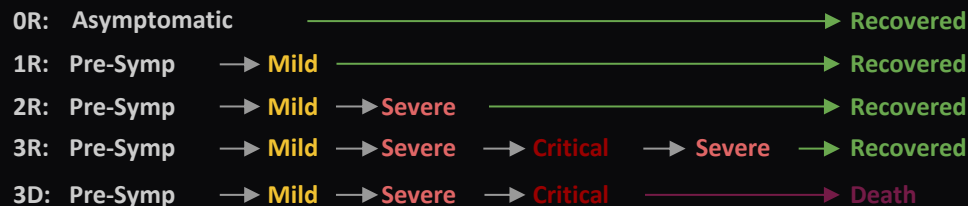

## Corresponding device sensitivity by viral load

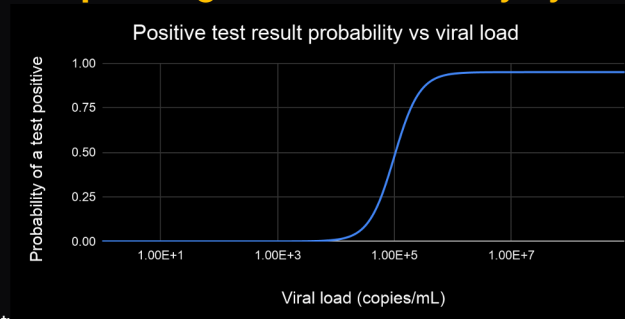

Supplement: MOESM1 [file 19932486]
